# Supplementary material for: Using NMR-Based Metabolomics to Evaluate Postprandial Urinary Responses Following Consumption of Minimally Processed Wheat Bran or Wheat Aleurone by Men and Women
Source: PubMed Central journal article supplement (PMC4772058; doi:10.3390/nu8020096), 2016-02-17
Supplement: nutrients-08-00096-s001.pdf [file nutrients-08-00096-s001.pdf]

# Supplementary Materials: Using NMR-Based Metabolomics to Evaluate Postprandial Urinary Responses Following Consumption of Minimally Processed Wheat Bran or Wheat Aleurone by Men and Women

Ramandeep Garg, Lorraine Brennan, Ruth K. Price, Julie M. W. Wallace, J. J. Strain, Mike J. Gibney, Peter R. Shewry, Jane L. Ward, Lalit Garg and Robert W. Welch

**Table S1.** VIPs, mean concentrations and differences in concentrations from <sup>1</sup>H NMR spectra of postprandial urine samples of aleurone *vs.* control at one hour for all chemical shifts having VIP value (for the first component) greater than 1 with 95% confidence (Jack-knifing (JK)).

| Chemical Shift (ppm) | VIP Component 1 | Aleurone |          | Control  |          | Difference | %Difference |
|----------------------|-----------------|----------|----------|----------|----------|------------|-------------|
|                      |                 | Mean     | S D      | Mean     | S D      |            |             |
| 1.32                 | 4.16249         | 14.27098 | 3.062182 | 7.251501 | 3.532878 | -7.0194747 | 96.8        |
| 3.24                 | 4.02001         | 8.238791 | 2.588537 | 15.48616 | 5.210814 | 7.24736637 | -46.8       |
| 1.56                 | 2.76565         | 6.473607 | 1.496637 | 3.359924 | 1.474532 | -3.1136826 | 92.7        |
| 1.28                 | 2.64036         | 8.245262 | 2.292278 | 5.049026 | 1.458486 | -3.1962359 | 63.3        |
| 2.20                 | 2.57021         | 6.966328 | 1.482933 | 4.224484 | 1.237119 | -2.7418449 | 64.9        |
| 3.04                 | 2.52177         | 131.2192 | 21.17296 | 140.6509 | 25.05072 | 9.43164082 | -6.7        |
| 2.16                 | 2.40019         | 9.034263 | 2.01052  | 6.329951 | 1.294214 | -2.7043116 | 42.7        |
| 3.68                 | 2.04940         | 24.73493 | 2.915893 | 21.96961 | 2.613812 | -2.765314  | 12.6        |
| 3.56                 | 2.04011         | 21.48823 | 12.23908 | 16.69236 | 4.407347 | -4.7958611 | 28.7        |
| 2.64                 | 1.91181         | 17.03774 | 4.481938 | 13.79421 | 4.72138  | -3.2435321 | 23.5        |
| 3.20                 | 1.82369         | 10.11876 | 2.830314 | 12.41903 | 2.017475 | 2.30026418 | -18.5       |
| 2.56                 | 1.82318         | 17.86715 | 4.32289  | 14.81978 | 4.639181 | -3.0473721 | 20.6        |
| 0.88                 | 1.80630         | 6.056719 | 1.614553 | 4.274602 | 1.145499 | -1.7821171 | 41.7        |
| 2.68                 | 1.77217         | 11.47222 | 2.989625 | 9.088912 | 2.670513 | -2.3833079 | 26.2        |
| 7.12                 | 1.72949         | 7.563787 | 2.595824 | 10.1234  | 4.151092 | 2.55960879 | -25.3       |
| 7.56                 | 1.67562         | 8.993662 | 5.203298 | 6.364859 | 2.274758 | -2.6288023 | 41.3        |
| 2.52                 | 1.60445         | 12.81225 | 2.705371 | 10.60473 | 3.280017 | -2.2075179 | 20.8        |
| 1.36                 | 1.44145         | 6.628033 | 1.925712 | 5.156502 | 1.243227 | -1.4715309 | 28.5        |
| 1.48                 | 1.42126         | 7.383495 | 2.577708 | 5.792986 | 1.149702 | -1.5905089 | 27.5        |
| 1.52                 | 1.38900         | 4.552364 | 1.597154 | 3.174042 | 1.449549 | -1.3783217 | 43.4        |
| 3.72                 | 1.32316         | 24.77209 | 6.872864 | 27.50995 | 7.370964 | 2.73785758 | -9.9        |
| 8.20                 | 1.27111         | 1.62975  | 0.745981 | 2.541526 | 0.74379  | 0.91177571 | -35.9       |
| 6.20                 | 1.23316         | 2.059606 | 1.095524 | 3.157927 | 1.341406 | 1.09832099 | -34.8       |
| 3.88                 | 1.21410         | 12.07729 | 3.242255 | 10.51419 | 2.078541 | -1.5631039 | 14.9        |
| 3.28                 | 1.20412         | 39.61967 | 14.88219 | 36.19298 | 12.36631 | -3.4266905 | 9.5         |
| 7.84                 | 1.18946         | 9.148038 | 5.364928 | 7.251094 | 2.732067 | -1.8969441 | 26.2        |
| 6.04                 | 1.15493         | 2.670983 | 1.364873 | 3.718709 | 1.2259   | 1.04772621 | -28.2       |
| 3.36                 | 1.14254         | 5.396922 | 0.836671 | 4.497122 | 1.047115 | -0.8997994 | 20.0        |
| 1.40                 | 1.10427         | 3.597015 | 1.390195 | 2.679131 | 0.671401 | -0.9178847 | 34.3        |
| 0.80                 | 1.09112         | 1.663855 | 0.736458 | 2.486962 | 0.98416  | 0.82310676 | -33.1       |
| 8.12                 | 1.08660         | 1.564265 | 0.772817 | 2.418736 | 1.103402 | 0.85447033 | -35.3       |
| 8.16                 | 1.05923         | 1.594912 | 0.741849 | 2.304637 | 0.604794 | 0.70972484 | -30.8       |
| 8.08                 | 1.03982         | 1.746189 | 0.660921 | 2.435821 | 0.663232 | 0.68963148 | -28.3       |
| 7.88                 | 1.02049         | 1.514524 | 0.793137 | 2.213375 | 0.634138 | 0.69885115 | -31.6       |
| 6.40                 | 1.01839         | 1.843823 | 0.809777 | 2.560051 | 0.70907  | 0.71622764 | -27.9       |
| 8.24                 | 1.00073         | 1.807235 | 0.983574 | 2.607875 | 1.033628 | 0.80064038 | -30.7       |

**Table S2.** VIPs, mean concentrations and differences in concentrations from <sup>1</sup>H NMR spectra of postprandial urine samples of aleurone *vs.* control at two hours for all chemical shifts having VIP value (for the first component) greater than 1 with 95% confidence (Jack-knifing (JK)).

| Chemical Shift (ppm) | VIP Component | Aleurone |          | Control  |          | Difference | %Difference |
|----------------------|---------------|----------|----------|----------|----------|------------|-------------|
|                      |               | Mean     | S D      | Mean     | S D      |            |             |
| 1.32                 | 4.12820       | 10.58116 | 2.690213 | 5.068215 | 1.417053 | -5.51294   | 108.8       |
| 3.24                 | 3.99567       | 8.889558 | 1.857856 | 15.48453 | 5.350281 | 6.594973   | -42.6       |
| 3.92                 | 3.25484       | 17.91443 | 7.870071 | 11.68593 | 4.777831 | -6.2285    | 53.3        |
| 3.68                 | 2.96992       | 26.68105 | 3.804554 | 21.92234 | 4.805783 | -4.75872   | 21.7        |
| 3.04                 | 2.76697       | 130.0666 | 32.05445 | 140.5462 | 22.52962 | 10.47969   | -7.5        |
| 2.16                 | 2.56255       | 8.651467 | 2.097343 | 5.860334 | 1.571695 | -2.79113   | 47.6        |
| 1.56                 | 2.55878       | 6.246367 | 1.034049 | 3.741607 | 1.60901  | -2.50476   | 66.9        |
| 2.20                 | 2.52924       | 6.39849  | 1.257234 | 4.019585 | 1.22371  | -2.37891   | 59.2        |
| 1.28                 | 2.19122       | 7.336893 | 1.969555 | 5.08087  | 1.476247 | -2.25602   | 44.4        |
| 3.88                 | 1.86983       | 12.26883 | 2.369351 | 10.08988 | 2.421863 | -2.17895   | 21.6        |
| 7.56                 | 1.73913       | 8.931182 | 3.697961 | 6.627128 | 2.713853 | -2.30405   | 34.8        |
| 3.56                 | 1.68759       | 19.68856 | 15.695   | 15.62201 | 4.22624  | -4.06655   | 26.0        |
| 3.72                 | 1.64661       | 23.5168  | 6.926321 | 26.75966 | 7.677015 | 3.242852   | -12.1       |
| 2.72                 | 1.59706       | 7.308311 | 0.809606 | 8.84356  | 2.070914 | 1.535249   | -17.4       |
| 7.84                 | 1.56286       | 9.005062 | 4.298748 | 6.874986 | 2.494041 | -2.13008   | 30.9        |
| 0.88                 | 1.56004       | 5.225581 | 1.31502  | 3.971861 | 0.842471 | -1.25372   | 31.6        |
| 3.20                 | 1.52903       | 10.38416 | 2.419885 | 12.26833 | 3.067967 | 1.884173   | -15.4       |
| 1.36                 | 1.50424       | 5.875327 | 1.241649 | 4.617884 | 1.165326 | -1.25744   | 27.2        |
| 1.52                 | 1.47182       | 4.091221 | 1.372411 | 2.931726 | 0.679603 | -1.15949   | 39.5        |
| 3.64                 | 1.36743       | 21.24291 | 2.927706 | 19.63015 | 2.230882 | -1.61277   | 8.2         |
| 8.04                 | 1.36031       | 4.114875 | 1.798802 | 5.746628 | 3.225487 | 1.631754   | -28.4       |
| 6.32                 | 1.32868       | 2.181474 | 0.946195 | 3.196211 | 1.063185 | 1.014737   | -31.7       |
| 7.12                 | 1.31352       | 7.523299 | 1.810512 | 9.192125 | 3.744832 | 1.668826   | -18.2       |
| 7.28                 | 1.29916       | 5.603135 | 0.951467 | 4.506218 | 1.485876 | -1.09692   | 24.3        |
| 3.60                 | 1.26684       | 10.0813  | 1.418628 | 8.709099 | 2.642426 | -1.3722    | 15.8        |
| 3.80                 | 1.25362       | 20.62982 | 4.68134  | 18.93676 | 1.794172 | -1.69305   | 8.9         |
| 8.00                 | 1.22489       | 5.299584 | 2.180769 | 4.147602 | 0.891356 | -1.15198   | 27.8        |
| 2.24                 | 1.20716       | 6.914553 | 1.201491 | 5.928257 | 1.193245 | -0.9863    | 16.6        |
| 5.84                 | 1.19703       | 4.675383 | 1.565235 | 5.880151 | 2.092716 | 1.204768   | -20.5       |
| 7.36                 | 1.15432       | 14.89945 | 6.204194 | 12.83476 | 6.039477 | -2.06468   | 16.1        |
| 3.96                 | 1.14727       | 26.08123 | 4.571917 | 24.46342 | 2.922645 | -1.61781   | 6.6         |
| 6.12                 | 1.09125       | 2.506214 | 0.708541 | 3.264201 | 0.962606 | 0.757987   | -23.2       |
| 8.72                 | 1.05726       | 1.520031 | 0.43754  | 2.235113 | 1.027241 | 0.715082   | -31.9       |
| 6.72                 | 1.05630       | 1.820275 | 0.604988 | 2.612203 | 1.262673 | 0.791928   | -30.3       |
| 6.36                 | 1.05137       | 2.220641 | 0.665685 | 2.995081 | 1.179953 | 0.77444    | -25.9       |
| 8.60                 | 1.04735       | 1.592131 | 0.508814 | 2.290507 | 0.9637   | 0.698376   | -30.5       |
| 5.92                 | 1.04555       | 2.294618 | 0.941447 | 3.097444 | 1.16875  | 0.802826   | -25.9       |
| 6.56                 | 1.04503       | 2.288887 | 0.798836 | 3.082522 | 1.216018 | 0.793634   | -25.7       |
| 6.44                 | 1.03204       | 2.343104 | 0.811768 | 3.14314  | 1.286103 | 0.800036   | -25.5       |
| 3.52                 | 1.01803       | 7.737351 | 1.810099 | 6.713265 | 1.962173 | -1.02409   | 15.3        |
| 2.28                 | 1.01244       | 9.226281 | 2.920357 | 7.950052 | 3.090526 | -1.27623   | 16.1        |

**Table S3.** VIPs, mean concentrations and differences in concentrations from <sup>1</sup>H NMR spectra of postprandial urine samples of bran *vs.* control at one hour for all chemical shifts having VIP value (for the first component) greater than 1 with 95% confidence (Jack-knifing (JK)).

| Chemical Shift (ppm) | VIP Component 1 | Bran     |          | Control  |          | Difference | %Difference |
|----------------------|-----------------|----------|----------|----------|----------|------------|-------------|
|                      |                 | Mean     | S D      | Mean     | S D      |            |             |
| 1.32                 | 3.22976         | 14.03238 | 4.202006 | 7.251501 | 3.532878 | -6.78088   | 93.5        |
| 3.04                 | 2.86864         | 125.8705 | 35.36431 | 140.6509 | 25.05072 | 14.78038   | -10.5       |
| 1.56                 | 2.82864         | 7.656341 | 1.730762 | 3.359924 | 1.474532 | -4.29642   | 127.9       |
| 2.16                 | 2.80171         | 10.41921 | 1.486837 | 6.329951 | 1.294214 | -4.08926   | 64.6        |
| 2.20                 | 2.48770         | 7.529601 | 1.17753  | 4.224484 | 1.237119 | -3.30512   | 78.2        |
| 1.28                 | 2.47481         | 8.523068 | 1.529586 | 5.049026 | 1.458486 | -3.47404   | 68.8        |
| 3.28                 | 2.13642         | 45.76975 | 31.2463  | 36.19298 | 12.36631 | -9.57677   | 26.5        |
| 3.68                 | 2.08969         | 25.92788 | 4.657039 | 21.96961 | 2.613812 | -3.95827   | 18.0        |
| 3.24                 | 2.06281         | 11.24925 | 3.377741 | 15.48616 | 5.210814 | 4.236908   | -27.4       |
| 3.52                 | 1.83286         | 8.874555 | 1.622894 | 6.551043 | 1.325381 | -2.32351   | 35.5        |
| 3.88                 | 1.69588         | 13.0864  | 2.655948 | 10.51419 | 2.078541 | -2.57221   | 24.5        |
| 3.48                 | 1.58521         | 4.57805  | 1.62778  | 2.756616 | 0.771308 | -1.82143   | 66.1        |
| 7.12                 | 1.57914         | 7.181518 | 3.319688 | 10.1234  | 4.151092 | 2.941877   | -29.1       |
| 1.52                 | 1.46920         | 4.807517 | 0.784111 | 3.174042 | 1.449549 | -1.63347   | 51.5        |
| 3.60                 | 1.44529         | 10.71369 | 1.677407 | 8.904177 | 1.517849 | -1.80951   | 20.3        |
| 0.88                 | 1.41586         | 5.807304 | 1.119021 | 4.274602 | 1.145499 | -1.5327    | 35.9        |
| 1.36                 | 1.40303         | 6.642524 | 0.846141 | 5.156502 | 1.243227 | -1.48602   | 28.8        |
| 2.32                 | 1.35996         | 4.124396 | 1.445991 | 2.725516 | 0.363736 | -1.39888   | 51.3        |
| 6.12                 | 1.33917         | 1.743012 | 1.062808 | 3.099028 | 0.915711 | 1.356016   | -43.8       |
| 2.40                 | 1.29894         | 4.226376 | 1.454959 | 2.883284 | 0.493987 | -1.34309   | 46.6        |
| 6.52                 | 1.24760         | 1.495537 | 0.799044 | 2.609847 | 0.696087 | 1.11431    | -42.7       |
| 2.08                 | 1.23366         | 7.955319 | 1.700262 | 6.469628 | 1.358598 | -1.48569   | 22.9        |
| 6.04                 | 1.19758         | 2.352536 | 1.502606 | 3.718709 | 1.2259   | 1.366173   | -36.7       |
| 3.92                 | 1.17109         | 18.50879 | 10.04208 | 15.17661 | 8.72161  | -3.33218   | 21.9        |
| 8.36                 | 1.14194         | 1.499548 | 0.588641 | 2.481909 | 0.800473 | 0.982361   | -39.6       |
| 6.48                 | 1.13920         | 1.469445 | 0.684679 | 2.361819 | 0.423019 | 0.892374   | -37.8       |
| 8.08                 | 1.13438         | 1.495018 | 0.634877 | 2.435821 | 0.663232 | 0.940803   | -38.6       |
| 8.24                 | 1.12107         | 1.528618 | 0.815723 | 2.607875 | 1.033628 | 1.079257   | -41.4       |
| 8.44                 | 1.11464         | 1.341518 | 0.829322 | 2.313624 | 0.660986 | 0.972105   | -42.0       |
| 5.92                 | 1.10277         | 1.801126 | 0.931051 | 2.838936 | 0.864324 | 1.03781    | -36.6       |
| 6.00                 | 1.10246         | 1.740932 | 0.977829 | 2.822414 | 0.9943   | 1.081482   | -38.3       |
| 3.56                 | 1.09193         | 19.41944 | 9.454625 | 16.69236 | 4.407347 | -2.72707   | 16.3        |
| 6.20                 | 1.09136         | 1.958378 | 1.205285 | 3.157927 | 1.341406 | 1.199549   | -37.9       |
| 3.72                 | 1.08381         | 24.72037 | 7.960002 | 27.50995 | 7.370964 | 2.789585   | -10.1       |
| 7.88                 | 1.07787         | 1.312408 | 0.730276 | 2.213375 | 0.634138 | 0.900967   | -40.7       |
| 1.72                 | 1.07724         | 4.090233 | 1.499458 | 2.916696 | 1.008155 | -1.17354   | 40.2        |
| 6.56                 | 1.07070         | 1.556704 | 0.930317 | 2.533062 | 0.754844 | 0.976358   | -38.5       |
| 6.72                 | 1.06493         | 1.401119 | 0.806436 | 2.313751 | 0.650196 | 0.912632   | -39.4       |
| 6.64                 | 1.06436         | 1.524363 | 0.777374 | 2.459477 | 0.765956 | 0.935114   | -38.0       |
| 6.16                 | 1.06166         | 1.754865 | 0.930114 | 2.761349 | 0.91607  | 1.006483   | -36.4       |
| 1.68                 | 1.04916         | 4.06487  | 1.339947 | 2.958195 | 1.020548 | -1.10668   | 37.4        |
| 2.28                 | 1.03384         | 9.272414 | 3.194829 | 7.628114 | 2.517126 | -1.6443    | 21.6        |
| 6.60                 | 1.03281         | 1.473845 | 0.80967  | 2.363446 | 0.683028 | 0.889601   | -37.6       |
| 8.88                 | 1.03014         | 1.163835 | 0.73215  | 2.050069 | 0.751731 | 0.886234   | -43.2       |
| 8.52                 | 1.02924         | 1.173862 | 0.709709 | 2.007899 | 0.580988 | 0.834037   | -41.5       |
| 8.40                 | 1.02075         | 1.41175  | 0.931872 | 2.291947 | 0.546338 | 0.880197   | -38.4       |
| 8.76                 | 1.01721         | 1.22601  | 0.750698 | 2.130143 | 0.849487 | 0.904133   | -42.4       |
| 6.28                 | 1.01390         | 1.604322 | 0.888807 | 2.541234 | 0.876    | 0.936912   | -36.9       |
| 1.76                 | 1.01269         | 3.556252 | 1.249734 | 2.577541 | 0.658803 | -0.97871   | 37.9        |
| 5.96                 | 1.01143         | 1.715038 | 0.890254 | 2.686527 | 1.022677 | 0.971489   | -36.2       |
| 9.04                 | 1.01010         | 1.138126 | 0.694567 | 1.967909 | 0.648979 | 0.829783   | -42.2       |
| 8.04                 | 1.01004         | 3.864529 | 2.350451 | 5.503831 | 3.426292 | 1.639301   | -29.8       |
| 9.16                 | 1.00815         | 1.209    | 0.783377 | 2.046918 | 0.598297 | 0.837918   | -40.9       |
| 8.32                 | 1.00750         | 1.358208 | 0.787128 | 2.266683 | 0.874335 | 0.908475   | -40.1       |
| 2.12                 | 1.00287         | 7.279841 | 1.525802 | 6.139425 | 1.288506 | -1.14042   | 18.6        |

**Table S4.** VIPs, mean concentrations and differences in concentrations from  $^1\text{H}$  NMR spectra of postprandial urine samples of bran *vs.* control at two hours for all chemical shifts having VIP value (for the first component) greater than 1 with 95% confidence (Jack-knifing (JK)).

| Chemical Shift (ppm) | VIP Component 1 | Bran     |          | Control  |          | Difference | %Difference |
|----------------------|-----------------|----------|----------|----------|----------|------------|-------------|
|                      |                 | Mean     | S D      | Mean     | S D      |            |             |
| 1.32                 | 4.99671         | 14.56618 | 3.347656 | 5.068215 | 1.417053 | -1.87403   | 187.4       |
| 3.04                 | 3.69807         | 121.4823 | 32.31417 | 140.5462 | 22.52962 | 0.135642   | -13.6       |
| 2.16                 | 3.31868         | 10.37552 | 2.252464 | 5.860334 | 1.571695 | -0.77047   | 77.0        |
| 1.56                 | 3.27916         | 8.147486 | 2.46779  | 3.741607 | 1.60901  | -1.17754   | 117.8       |
| 2.20                 | 3.27164         | 8.422423 | 1.947318 | 4.019585 | 1.22371  | -1.09535   | 109.5       |
| 1.28                 | 2.69190         | 8.623663 | 1.701308 | 5.08087  | 1.476247 | -0.69728   | 69.7        |
| 3.68                 | 2.58043         | 29.29499 | 7.445593 | 21.92234 | 4.805783 | -0.33631   | 33.6        |
| 3.28                 | 2.24345         | 36.65182 | 15.80437 | 30.98786 | 6.875153 | -0.18278   | 18.3        |
| 3.88                 | 2.20662         | 14.18108 | 2.052555 | 10.08988 | 2.421863 | -0.40548   | 40.5        |
| 3.24                 | 2.13798         | 11.38725 | 4.252732 | 15.48453 | 5.350281 | 0.264605   | -26.5       |
| 3.92                 | 2.10417         | 16.14767 | 6.609428 | 11.68593 | 4.777831 | -0.38181   | 38.2        |
| 1.52                 | 2.02322         | 4.72478  | 1.480755 | 2.931726 | 0.679603 | -0.6116    | 61.2        |
| 3.56                 | 1.94370         | 21.46209 | 10.54476 | 15.62201 | 4.22624  | -0.37384   | 37.4        |
| 1.24                 | 1.89483         | 8.553053 | 5.04785  | 9.375028 | 2.237279 | 0.087677   | -8.8        |
| 1.36                 | 1.48712         | 5.867329 | 1.252633 | 4.617884 | 1.165326 | -0.27057   | 27.1        |
| 0.88                 | 1.43091         | 5.089939 | 1.164659 | 3.971861 | 0.842471 | -0.2815    | 28.2        |
| 6.32                 | 1.36127         | 1.884843 | 0.753703 | 3.196211 | 1.063185 | 0.410288   | -41.0       |
| 3.80                 | 1.35580         | 22.12046 | 4.073146 | 18.93676 | 1.794172 | -0.16812   | 16.8        |
| 6.44                 | 1.31358         | 1.859738 | 0.848478 | 3.14314  | 1.286103 | 0.408319   | -40.8       |
| 3.60                 | 1.27876         | 11.1747  | 2.525064 | 8.709099 | 2.642426 | -0.28311   | 28.3        |
| 3.52                 | 1.21077         | 8.992438 | 1.828222 | 6.713265 | 1.962173 | -0.3395    | 33.9        |
| 6.12                 | 1.16552         | 2.135908 | 0.932849 | 3.264201 | 0.962606 | 0.345657   | -34.6       |
| 8.04                 | 1.15442         | 4.053297 | 2.156819 | 5.746628 | 3.225487 | 0.294665   | -29.5       |
| 2.64                 | 1.13131         | 13.44189 | 3.893371 | 15.5738  | 5.368122 | 0.136891   | -13.7       |
| 7.84                 | 1.02218         | 5.449178 | 1.936268 | 6.874986 | 2.494041 | 0.207391   | -20.7       |
| 3.40                 | 1.01008         | 5.408643 | 2.069119 | 4.36044  | 1.906471 | -0.24039   | 24.0        |
